# Supplementary figures and images for: Improving cardiovascular health in black men through a 24-week community-based team lifestyle change intervention: The black impact pilot study
Source: PubMed Central journal article supplement — Am J Prev Cardiol. 2022 Jan 13;9:100315. doi: 10.1016/j.ajpc.2022.100315 (PMC8801748; doi:10.1016/j.ajpc.2022.100315), 2022-01-13

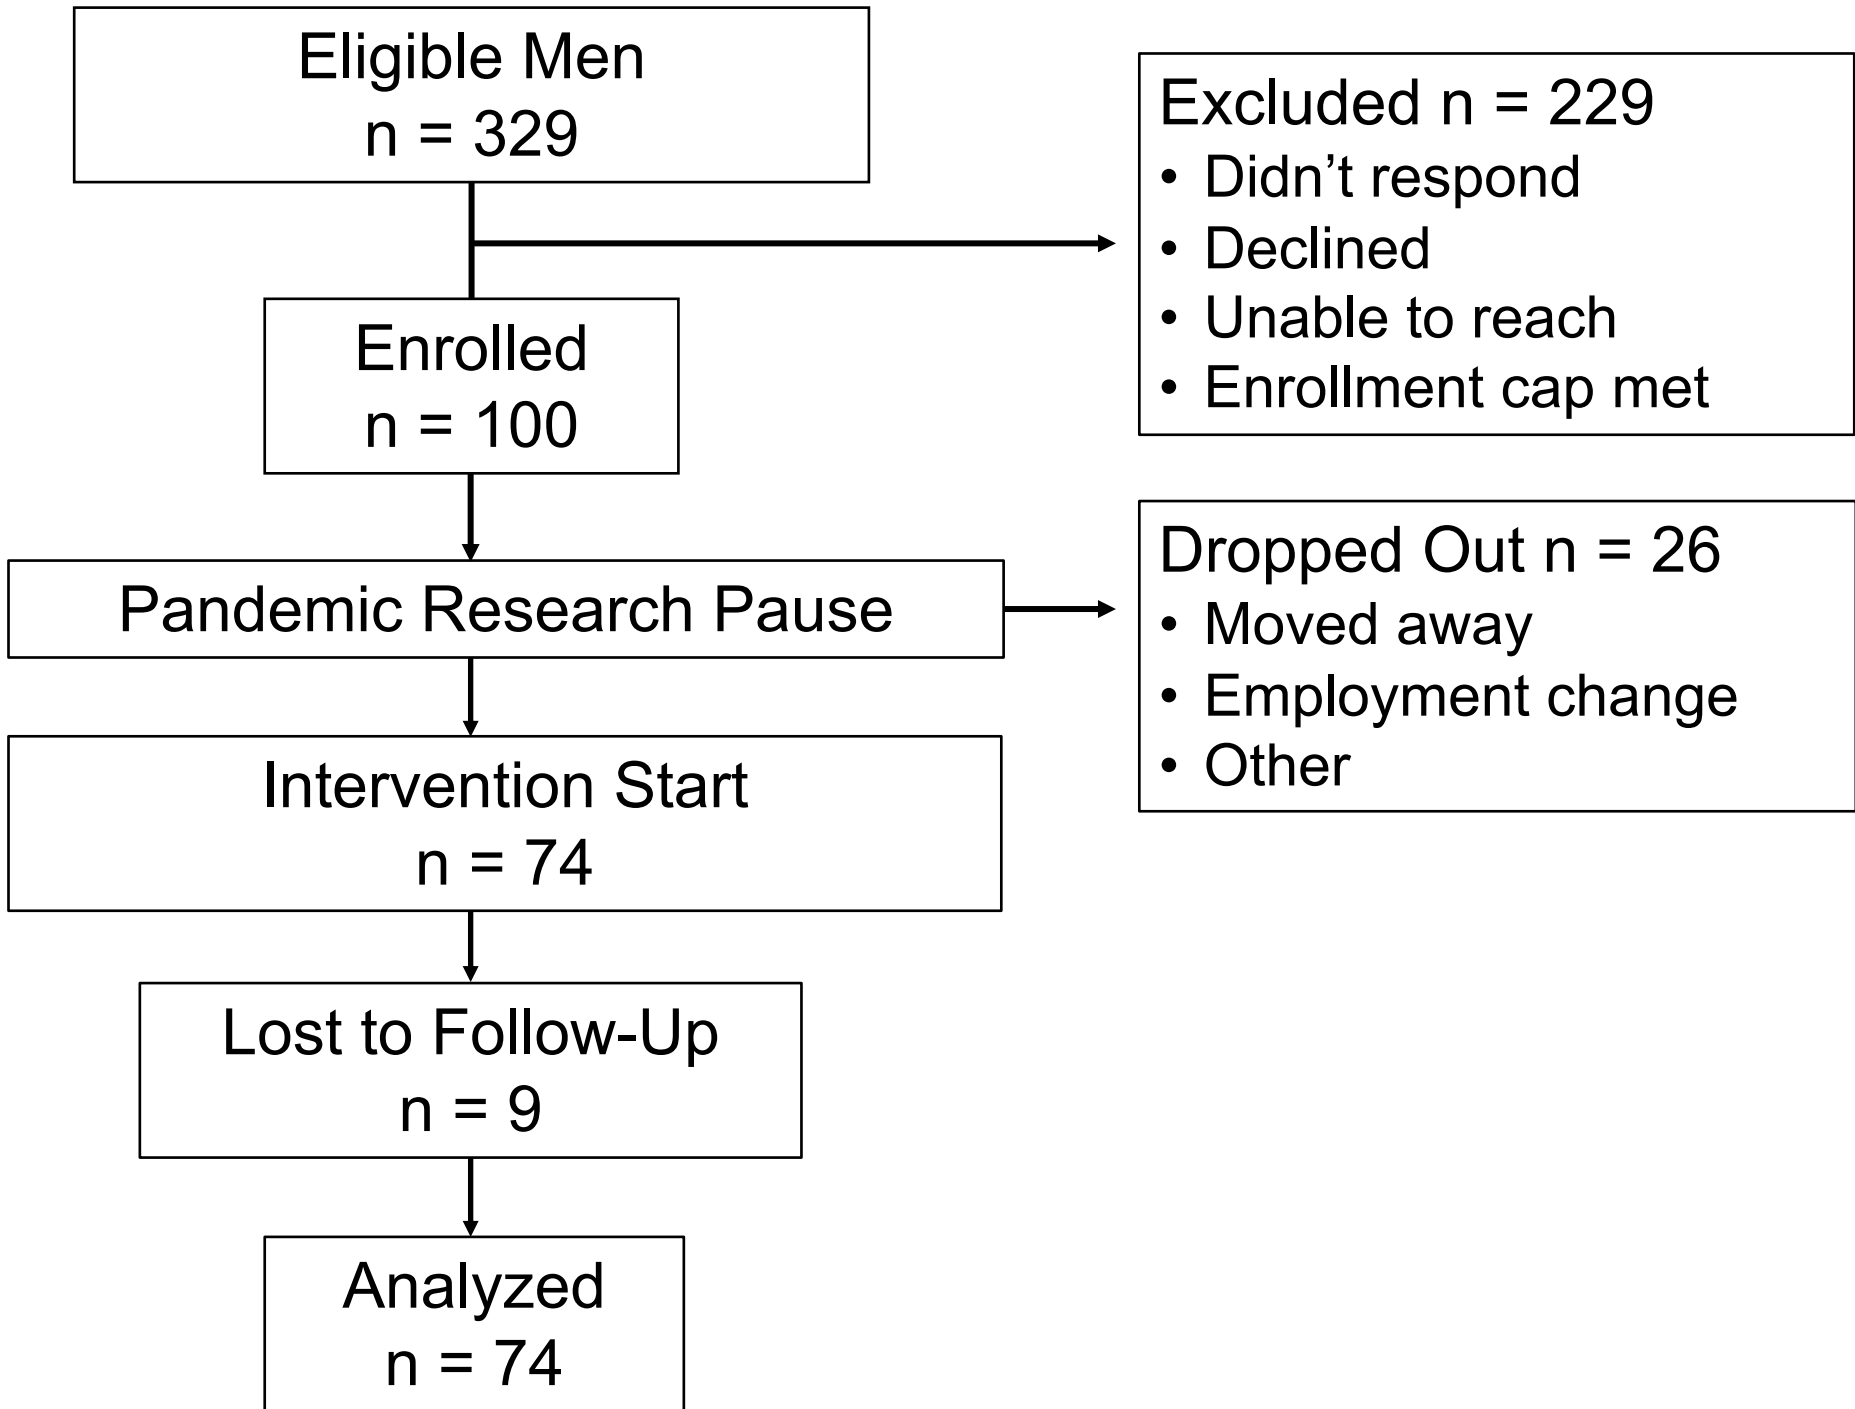

Supplement: mmc2.pdf [file mmc2.pdf]
